# Supplementary material
Source: publisher figshare collection journal article supplement (https://tandf.figshare.com/ndownloader/files/23211419)
Supplement: Supplementary file 1 [file 23211419]

SUPPLEMENTAL MATERIAL

to

Inside Pandora’s Box: A Systematic Review of the Assessment of the Perceived Quality of Chatbots for People with Disabilities or Special Needs

by

Stefano Federici, Maria Laura de Filippis, Maria Laura Mele, Simone Borsci, Marco Bracalenti, Giancarlo Gaudino, Antonello Cocco, Massimo Amendola, Emilio Simonetti

**PRISMA checklist**

| **The focus** | Peer-review articles and conference papers that include empirical assessment of the quality of interactions between people with disabilities or special needs and chatbots. |
| --- | --- |
| **The goal** | To integrate and generalise previous findings and discuss how key factors of interaction with chatbots are assessed. |
| **Perspective** | The language of the literature review will be neutral. |
| **Coverage** | The review will cover central or pivotal literature only. |
| **Organisation** | The review will be organised around the proposition of exploring, mapping and defining how interaction is measured to ensure quality interactions for users with disabilities or special needs. |
| **Audience** | *Primary* – experts in the development and assessment of chatbots. |
| **Methodology** | This literature review is qualitative and will follow the phenomenological method of literature review. |
| **Inclusion criteria** | - Studies that mention chatbots or conversational interfaces/agents for people with disabilities or special needs in their title, abstract, keywords or main text. - Studies that include findings and theories or frameworks about factors that might potentially contribute to the perceived quality of interaction with chatbots, with a particular focus on people with various types of disability; or studies that at least discuss topics relating to universal access and the accessibility and usability of information. - Studies from 2010 to 2020. |
| **Exclusion criteria** | - Studies that talk only about technical aspects of the chatbots or virtual AI conversational assistants, with no or minimal insights into key factors of quality. - Studies that inform not about interaction characteristics but about ethical or social concerns. - Studies that focus mainly on chatbots as tools for investigating other aspects, such as eye movements or emotion recognition. |
| **Search Inquiry—Scopus** | chatbot OR chatbots OR “conversational agent” OR “conversational agents” AND disability OR “special needs” AND (LIMIT-TO (PUBYEAR, 2019) OR LIMIT-TO (PUBYEAR, 2018) OR LIMIT-TO ( PUBYEAR, 2017 ) OR LIMIT-TO (PUBYEAR , 2016) OR LIMIT-TO (PUBYEAR, 2015) OR LIMIT-TO (PUBYEAR, 2014 ) OR LIMIT-TO (PUBYEAR, 2013) OR LIMIT-TO (PUBYEAR, 2012 ) OR LIMIT-TO  PUBYEAR , 2011) OR LIMIT-TO (PUBYEAR, 2010 ) ) AND ( LIMIT-TO (LANGUAGE , “English”) ) AND (LIMIT-TO (DOCTYPE, “ch”) OR LIMIT-TO (DOCTYPE, “re” ) OR LIMIT-TO (DOCTYPE, “bk”) OR LIMIT-TO (DOCTYPE, “cr” ) OR LIMIT-TO  DOCTYPE, “ed”) OR LIMIT-TO (DOCTYPE, “Undefined”) ) |
| **Search Inquiry—the Web of Science** | (TS=(chatbot* AND disability) OR TS=(chatbot* AND special needs) OR TS=(conversational agent* AND disability) OR TS=(conversational agent* AND special needs)) AND LANGUAGE: (English) AND DOCUMENT TYPES: (Article)  Timespan: 2010-2020. Indexes: SCI-EXPANDED, SSCI, A&HCI, CPCI-S, CPCI-SSH, ESCI |
| **Tools** | Prisma Flow diagram, PRISMA 2009 Checklist (<http://prisma-statement.org/>) |
